# Supplementary material for: Recovery of enzyme structure and activity following rehydration from ionic liquid
Source: Royal Society of Chemistry journal article supplement (doi:10.1039/d2cp00608a), 2022-01-01
Supplement: d2cp00608a1.pdf [file d2cp00608a1.pdf]

## Recovery of enzyme structure and activity following rehydration from ionic liquid

Pei-Yin Lee, Onkar Singh, Harry Bermudez, and Silvina Matysiak

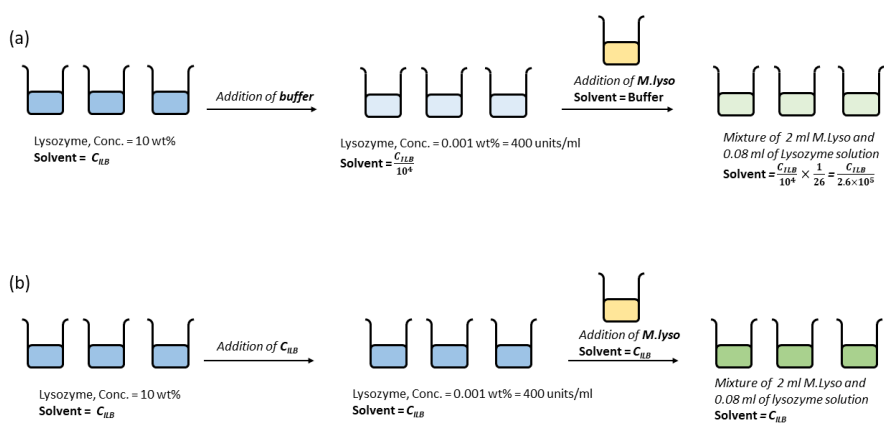

Figure S1: Schematic of activity assays. (a) "Traditional" assay where samples are diluted with phosphate buffer to achieve required final enzyme concentration of 400 U/mL. (b) "Modified" assay where samples are prepared and mixed at a constant composition,  $C_{ILB}$  refers to IL-buffer mixture from 5% to 17% IL.

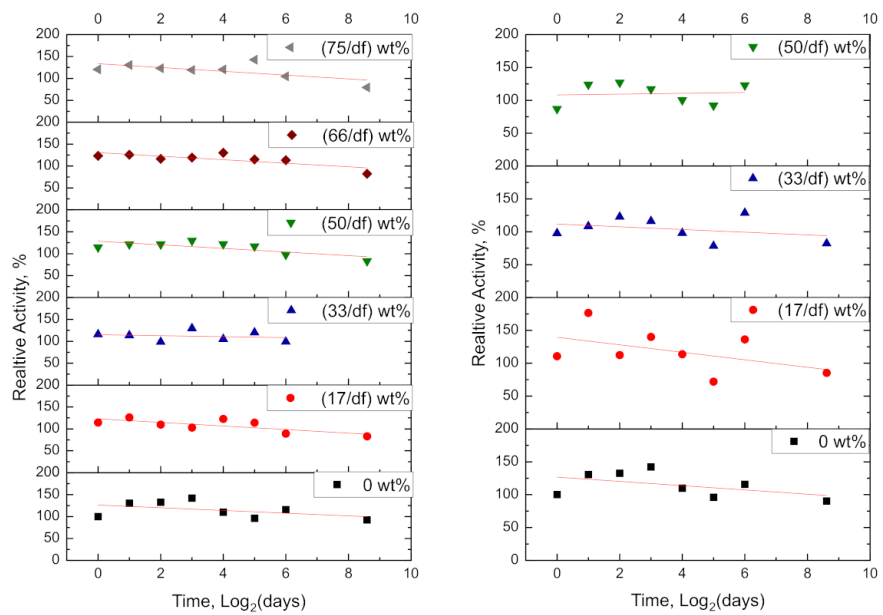

Figure S2: Lysozyme activity after rehydration, following different storage times in IL-water mixtures. The dilution factor  $df = 2.6 \times 10^5$ . Left: [EMIM][EtSO<sub>4</sub>]. Right: [EMIM][Et<sub>2</sub>PO<sub>4</sub>]

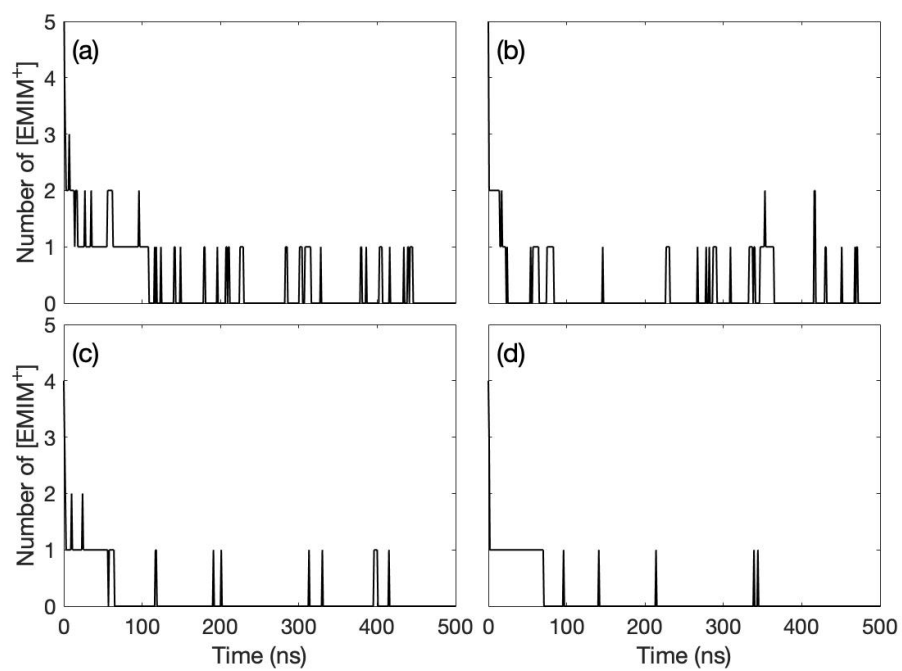

Figure S3: The time series showing the number of [EMIM<sup>+</sup>] molecules near the non-native ligand binding site for (a) rehydrated [EMIM][EtSO<sub>4</sub>] system replica 2, (b) rehydrated [EMIM][EtSO<sub>4</sub>] system replica 3, (c) rehydrated [EMIM][Et<sub>2</sub>PO<sub>4</sub>] system replica 2, and rehydrated [EMIM][Et<sub>2</sub>PO<sub>4</sub>] system replica 3.

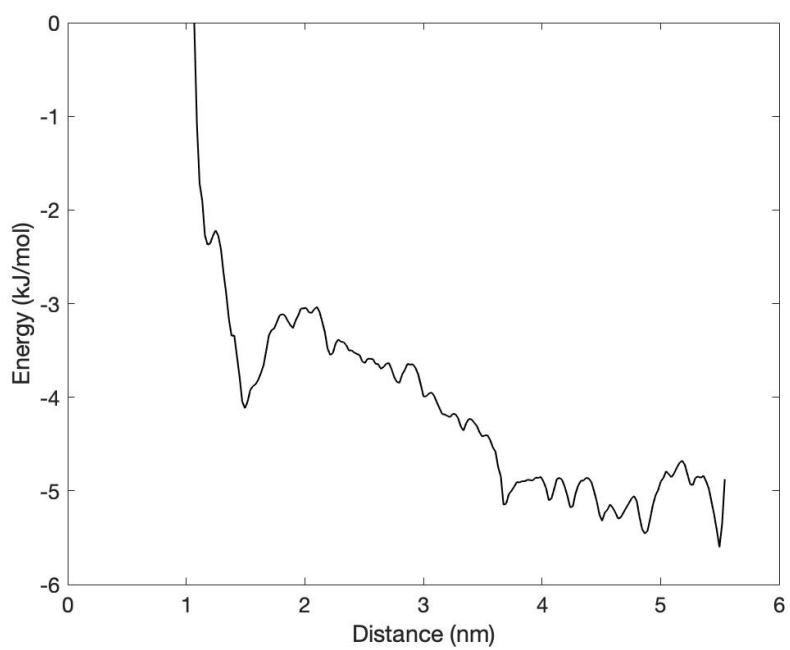

Figure S4: Umbrella sampling simulations showing the PMF plot for the distance of an [EMIM<sup>+</sup>] molecule away from the lysozyme along the pulling direction in a hydrated system.

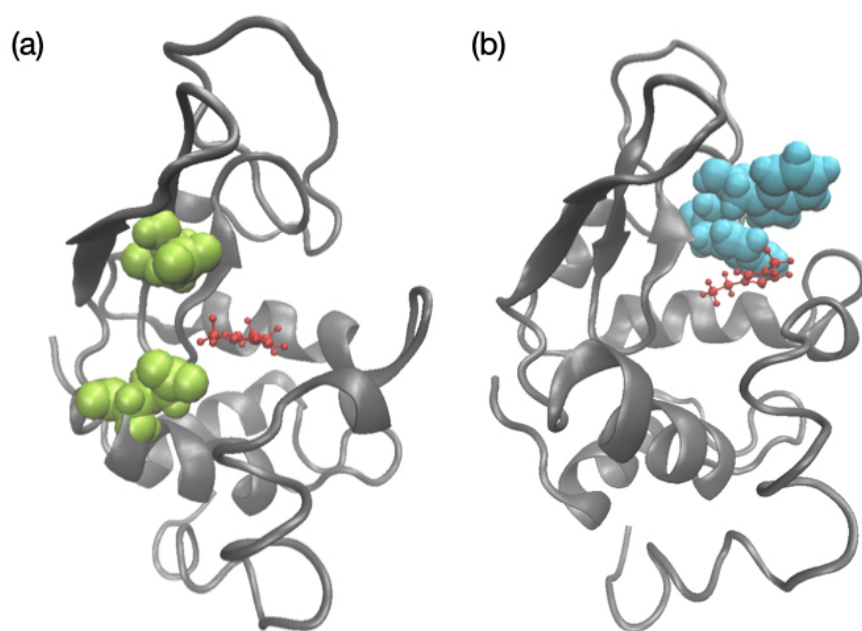

Figure S5: Illustration showing the close contact between an [EMIM<sup>+</sup>] molecule (red) and (a) the active site residues (green) (b) TRP62/63 residues (cyan).
